# Supplementary material for: Tune the chemical activity of graphene via the transition metal substrate
Source: Royal Society of Chemistry journal article supplement (doi:10.1039/c8ra00735g), 2018-01-01
Supplement: c8ra00735g1.pdf [file c8ra00735g1.pdf]

## Supporting Information

### Tune the chemical activity of graphene via the transition metal substrate

Yuan Ma<sup>a</sup>, Lei Gao<sup>a\*</sup>, Yu Yan<sup>a</sup>, Yanjing Su<sup>a</sup>, and Lijie Qiao<sup>a</sup>

<sup>a</sup> Corrosion and Protection Center, Key Laboratory for Environmental Fracture (MOE), University of Science and Technology Beijing, Beijing 100083, China

Corresponding author: gaolei@ustb.edu.cn

#### DOS prior to and after the adsorption of H or F atom

The density of states prior to and after the adsorption of H or F atom on the graphene/Re(0001) and graphene/Pt(111) are presented in Fig. S1. Here, one of the three nearest neighbor C atoms around the adsorption site and the substrate Re (or Pt) atom beneath were selected to calculate the partial density of states (PDOSs) of C atom  $2p_z$  orbital and Re (or Pt) atom  $5d_z^2$  orbital. The calculated PDOSs confirm the variations of charge transfer between the C atoms and substrate metal atoms after the adsorption of H or F atom.

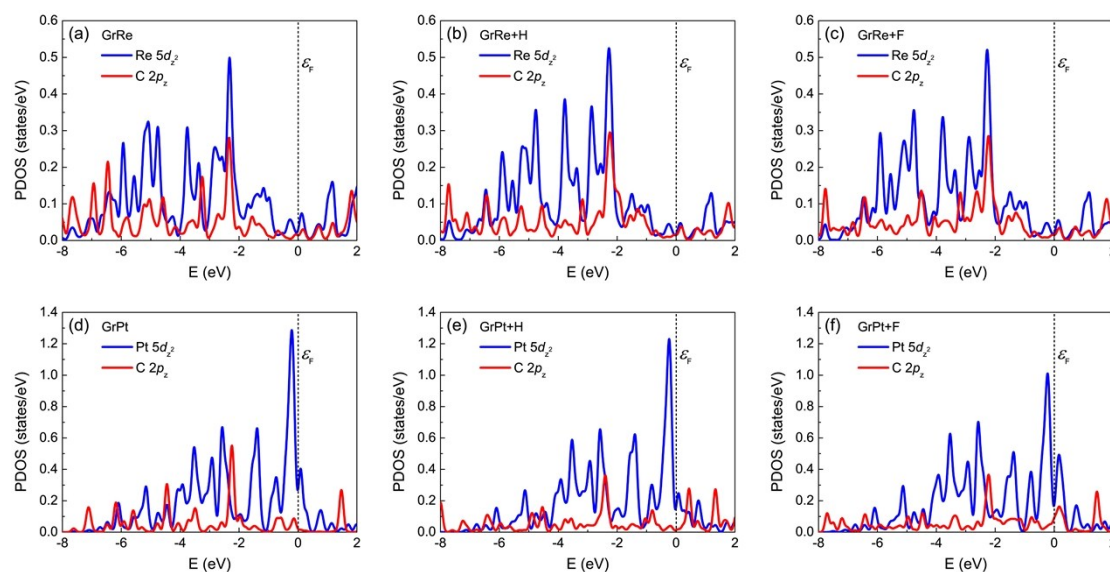

**Fig. S1** (a)-(c) The PDOSs of C atom  $2p_z$  and Re atom  $5d_z^2$  orbitals prior to and after the adsorption of H or F atom. (d)-(f) The PDOSs of C atom  $2p_z$  and Pt atom  $5d_z^2$  orbitals prior to and after the adsorption of H or F atom.
